# Supplementary material for: Visualization of G-quadruplexes by using a BODIPY-labeled macrocyclic heptaoxazole
Source: Royal Society of Chemistry journal article supplement (doi:10.1039/c002117b), 2010-01-01
Supplement: c002117b.pdf [file c002117b.pdf]

Visualization of G-quadruplexes by Using a BODIPY-Labeled Macrocyclic Heptaoxazole

Masayuki Tera,<sup>a</sup> Keisuke Iida,<sup>a</sup> Kazunori Ikebukuro,<sup>a</sup> Hiroyuki Seimiya,<sup>b</sup>  
Kazuo Shin-ya,<sup>c</sup> and Kazuo Nagasawa<sup>\*a</sup>

<sup>a</sup> M. Tera, K. Iida, Prof. Dr. K. Ikebukuro, Prof. Dr. K. Nagasawa  
Department of Biotechnology and Life Science, Faculty of Technology  
Tokyo University of Agriculture and Technology  
2-24-16 Nakamachi, Koganei Tokyo 184-8588 (Japan)  
Fax: (+81) 42-388-7295  
E-mail: [knaga@cc.tuat.ac.jp](mailto:knaga@cc.tuat.ac.jp)

<sup>b</sup> Dr. H. Seimiya  
Cancer Chemotherapy Center  
Japanese Foundation for Cancer Research

<sup>c</sup> Dr. K. Shin-ya  
Biological Information Research Center  
National Institute of Advanced Industrial Science and Technology

-----  
**Table of Contents:**

|                                                                     |     |
|---------------------------------------------------------------------|-----|
| 1. Synthesis of activated ester of BODIPY ( <b>S2</b> ).....        | 2   |
| 2. HPLC chart for L1BOD-7OTD ( <b>2</b> ).....                      | 2   |
| 3. Copies of NMR spectra of compounds ( <b>S2</b> , <b>2</b> )..... | 3-6 |
| 4. Excitation and emission spectrum of L1BOD-7OTD ( <b>2</b> )..... | 7   |
| 5. UV melting analysis.....                                         | 8   |
| 6. ESI-MS spectra.....                                              | 9   |
| 7. Fluorescent polarization titration.....                          | 10  |

## Synthesis of activated ester of BODIPY **S2**.

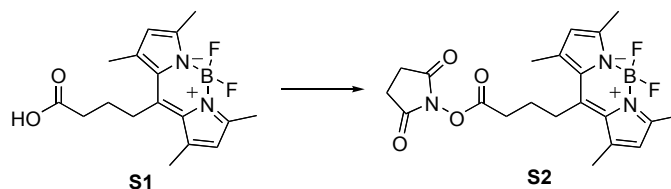

To a solution of **S1**<sup>1</sup> (450 mg, 1.35 mmol) in THF (10 mL), was added Et<sub>3</sub>N (1.0 mL, 6.75 mmol), EDCI (776 mg, 6.75 mmol) N-hydroxysuccinimide (466 mg, 4.05 mmol), and the mixture was stirred for 12 h at room temperature. To the reaction mixture was added H<sub>2</sub>O and the organic layer was extracted with AcOEt, dried over MgSO<sub>4</sub>, filtered, and concentrated *in vacuo*. The residue was chromatographed on silica gel (CHCl<sub>3</sub>-AcOEt = 20:1) to give activated ester of BODIPY **S2** as a dark red solid (284 mg, 50%). TLC R<sub>f</sub> = 0.5 (6:1 CHCl<sub>3</sub>/EtOAc)

Spectral data for **S2**: <sup>1</sup>H NMR (400 MHz, DMSO-d<sub>6</sub>) δ 6.24 (s, 2H), 3.07 (m, 2H), 2.95 (t, J = 6.9 Hz, 2H), 2.42 (s, 6H), 2.40 (s, 6H), 1.90 (m, 2H); <sup>13</sup>C NMR (100 MHz, DMSO-d<sub>6</sub>) δ 170.2, 168.6, 153.5, 145.1, 141.1, 130.7, 121.9, 30.2, 26.6, 26.1, 25.4, 15.9, 14.1; HRMS (ESI, M+Na) calcd for C<sub>21</sub>H<sub>24</sub>BF<sub>2</sub>N<sub>3</sub>O<sub>4</sub>Na 454.1726, found 454.1715.

<sup>1</sup>Z. Li, E. Mintzer, R. Bittman, *J. Org. Chem.* 2006, **71**, 1718-1721.

## HPLC chart of L1BOD-7OTD (**2**).

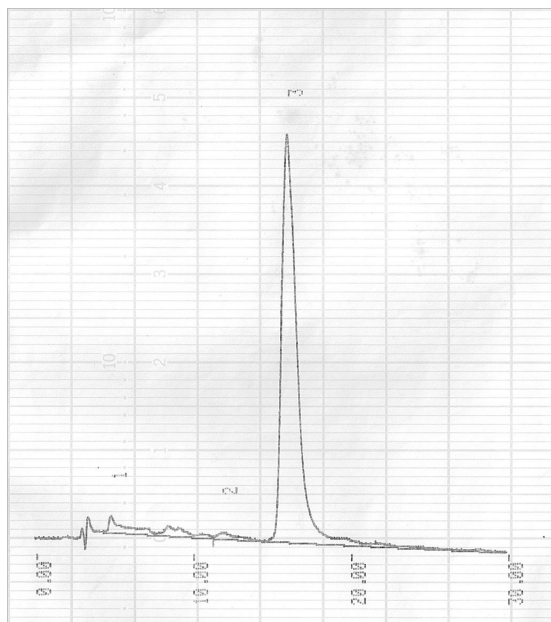

| No' | Retention Time (min) | Peak Area (%) |
|-----|----------------------|---------------|
| 1   | 4.861                | 6.81          |
| 2   | 11.885               | 1.66          |
| 3   | 16.081               | 91.53         |

Copies of NMR spectra of compounds **S2** and **2**.

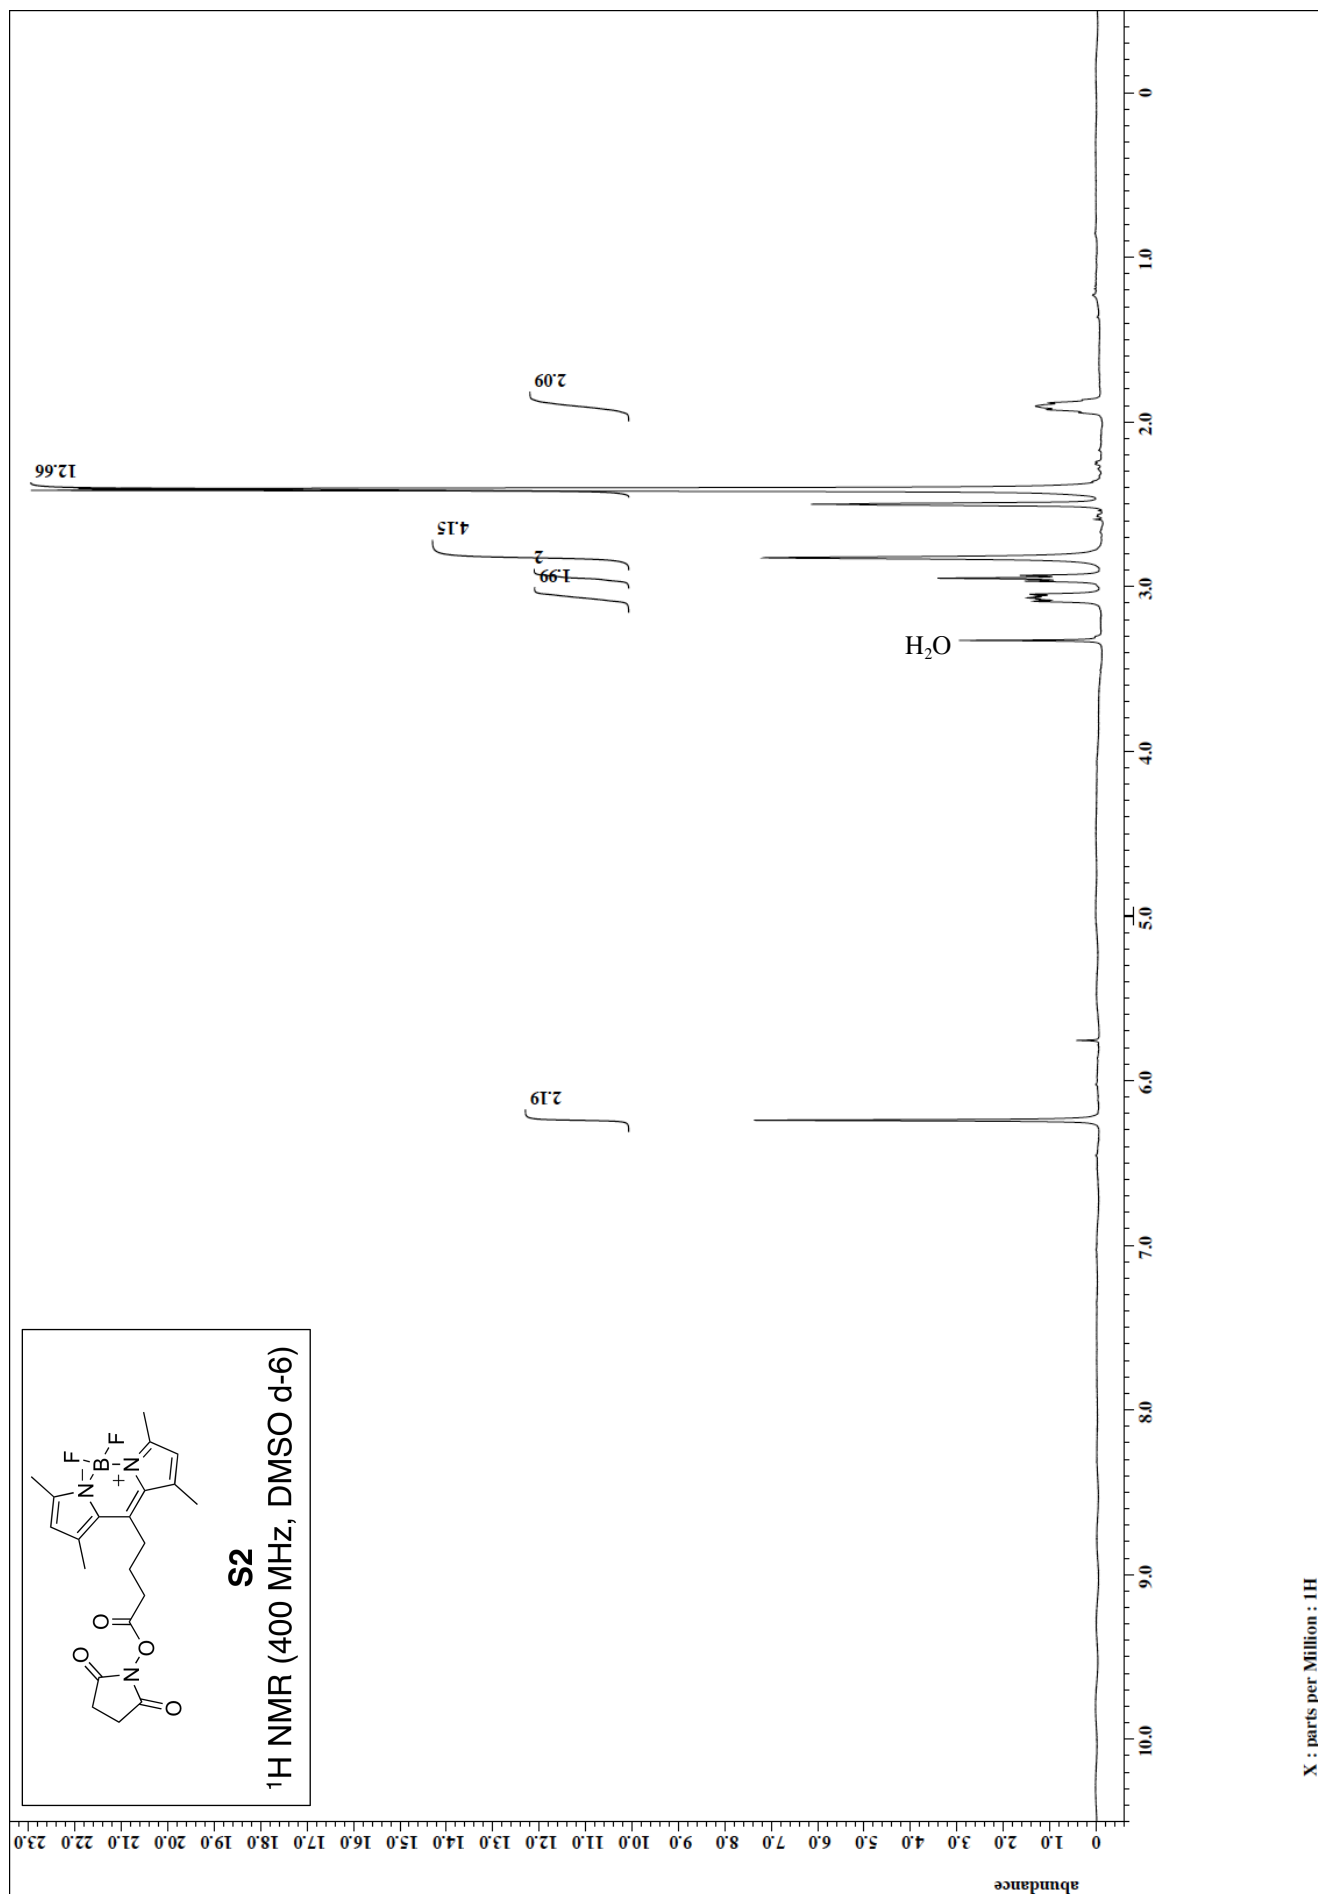

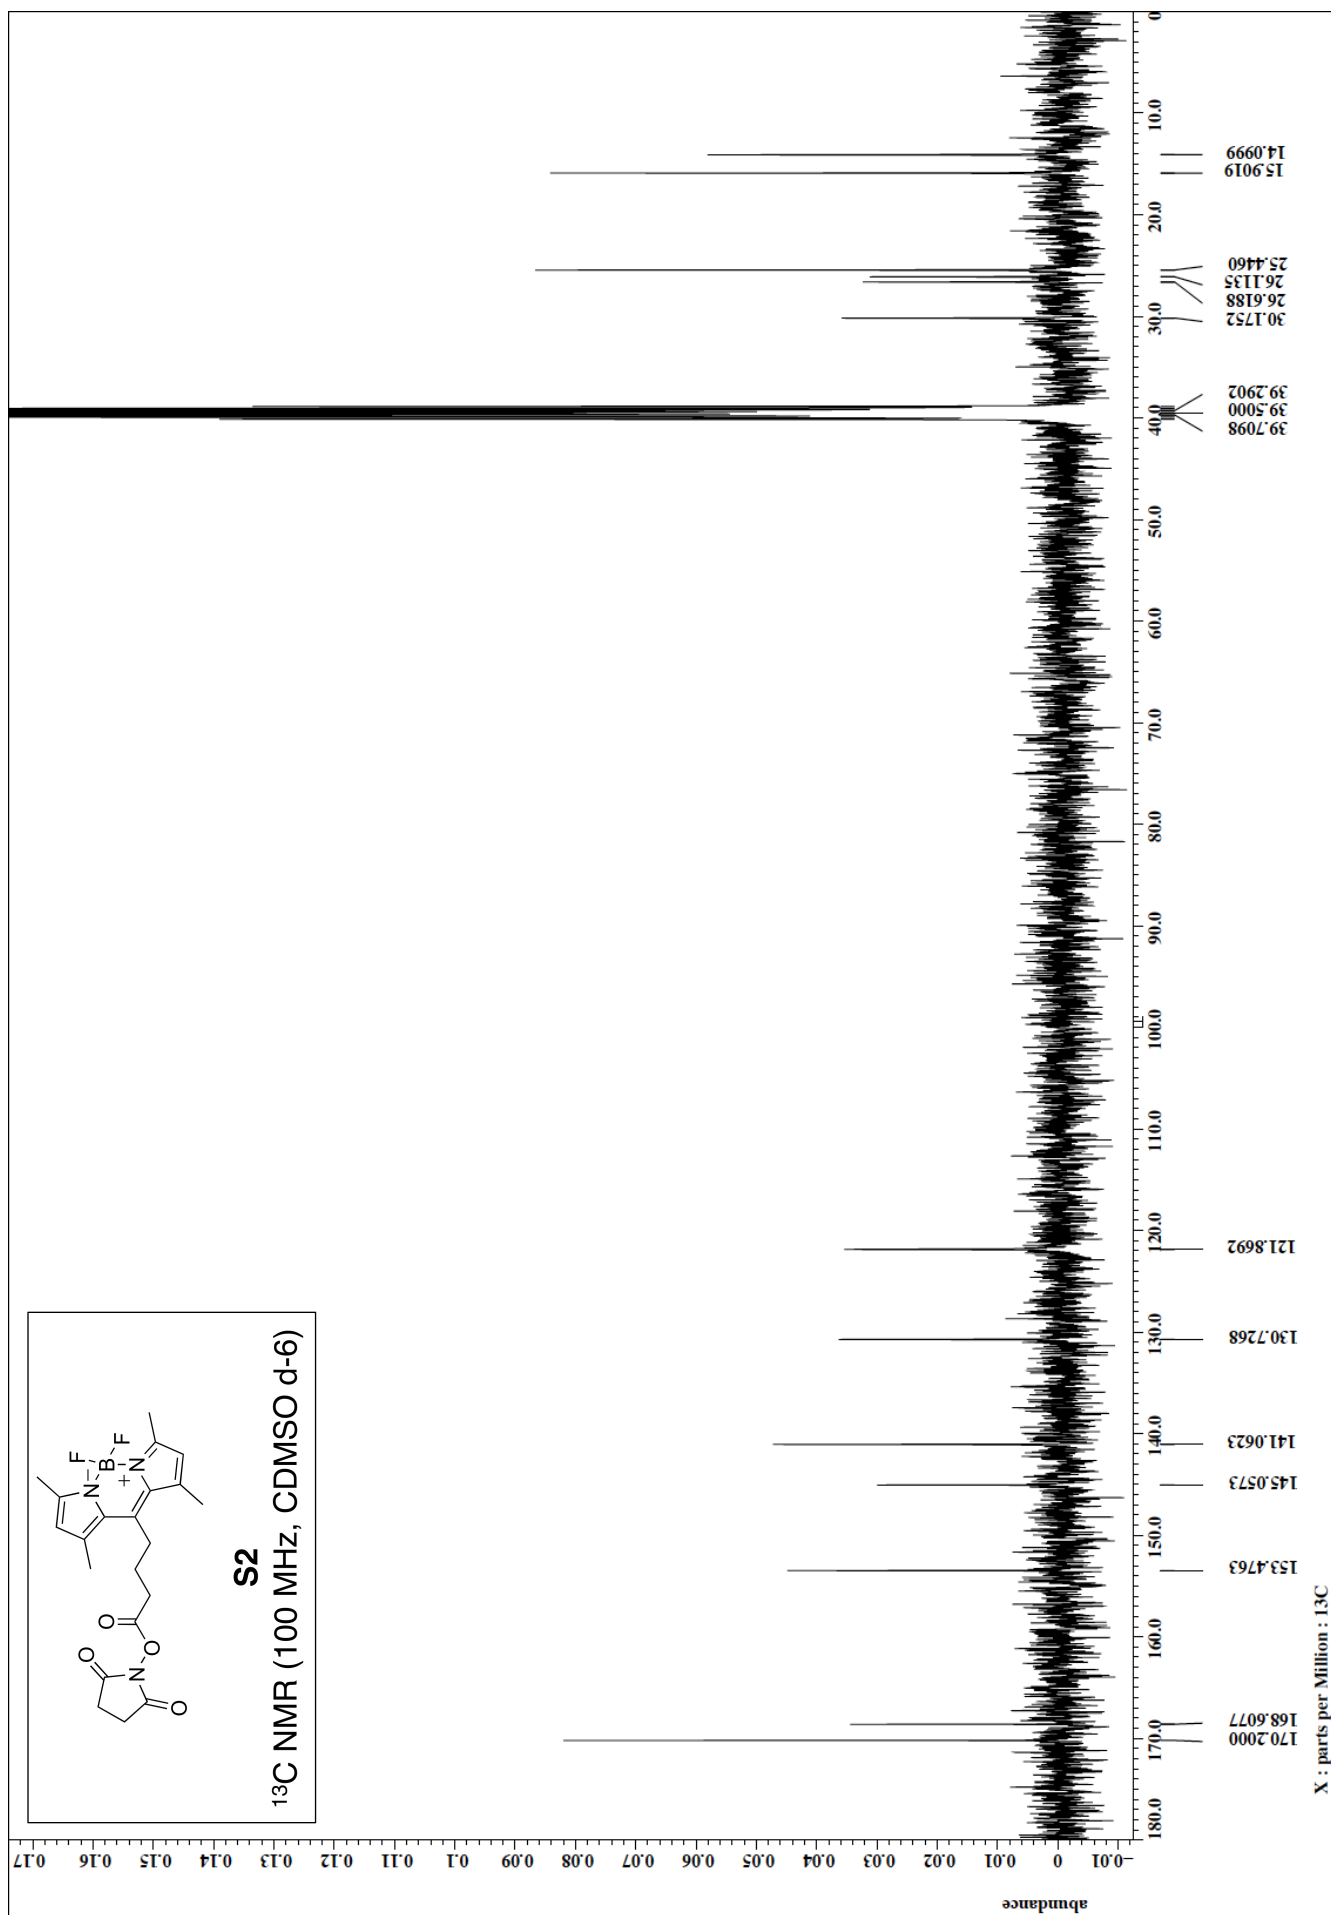

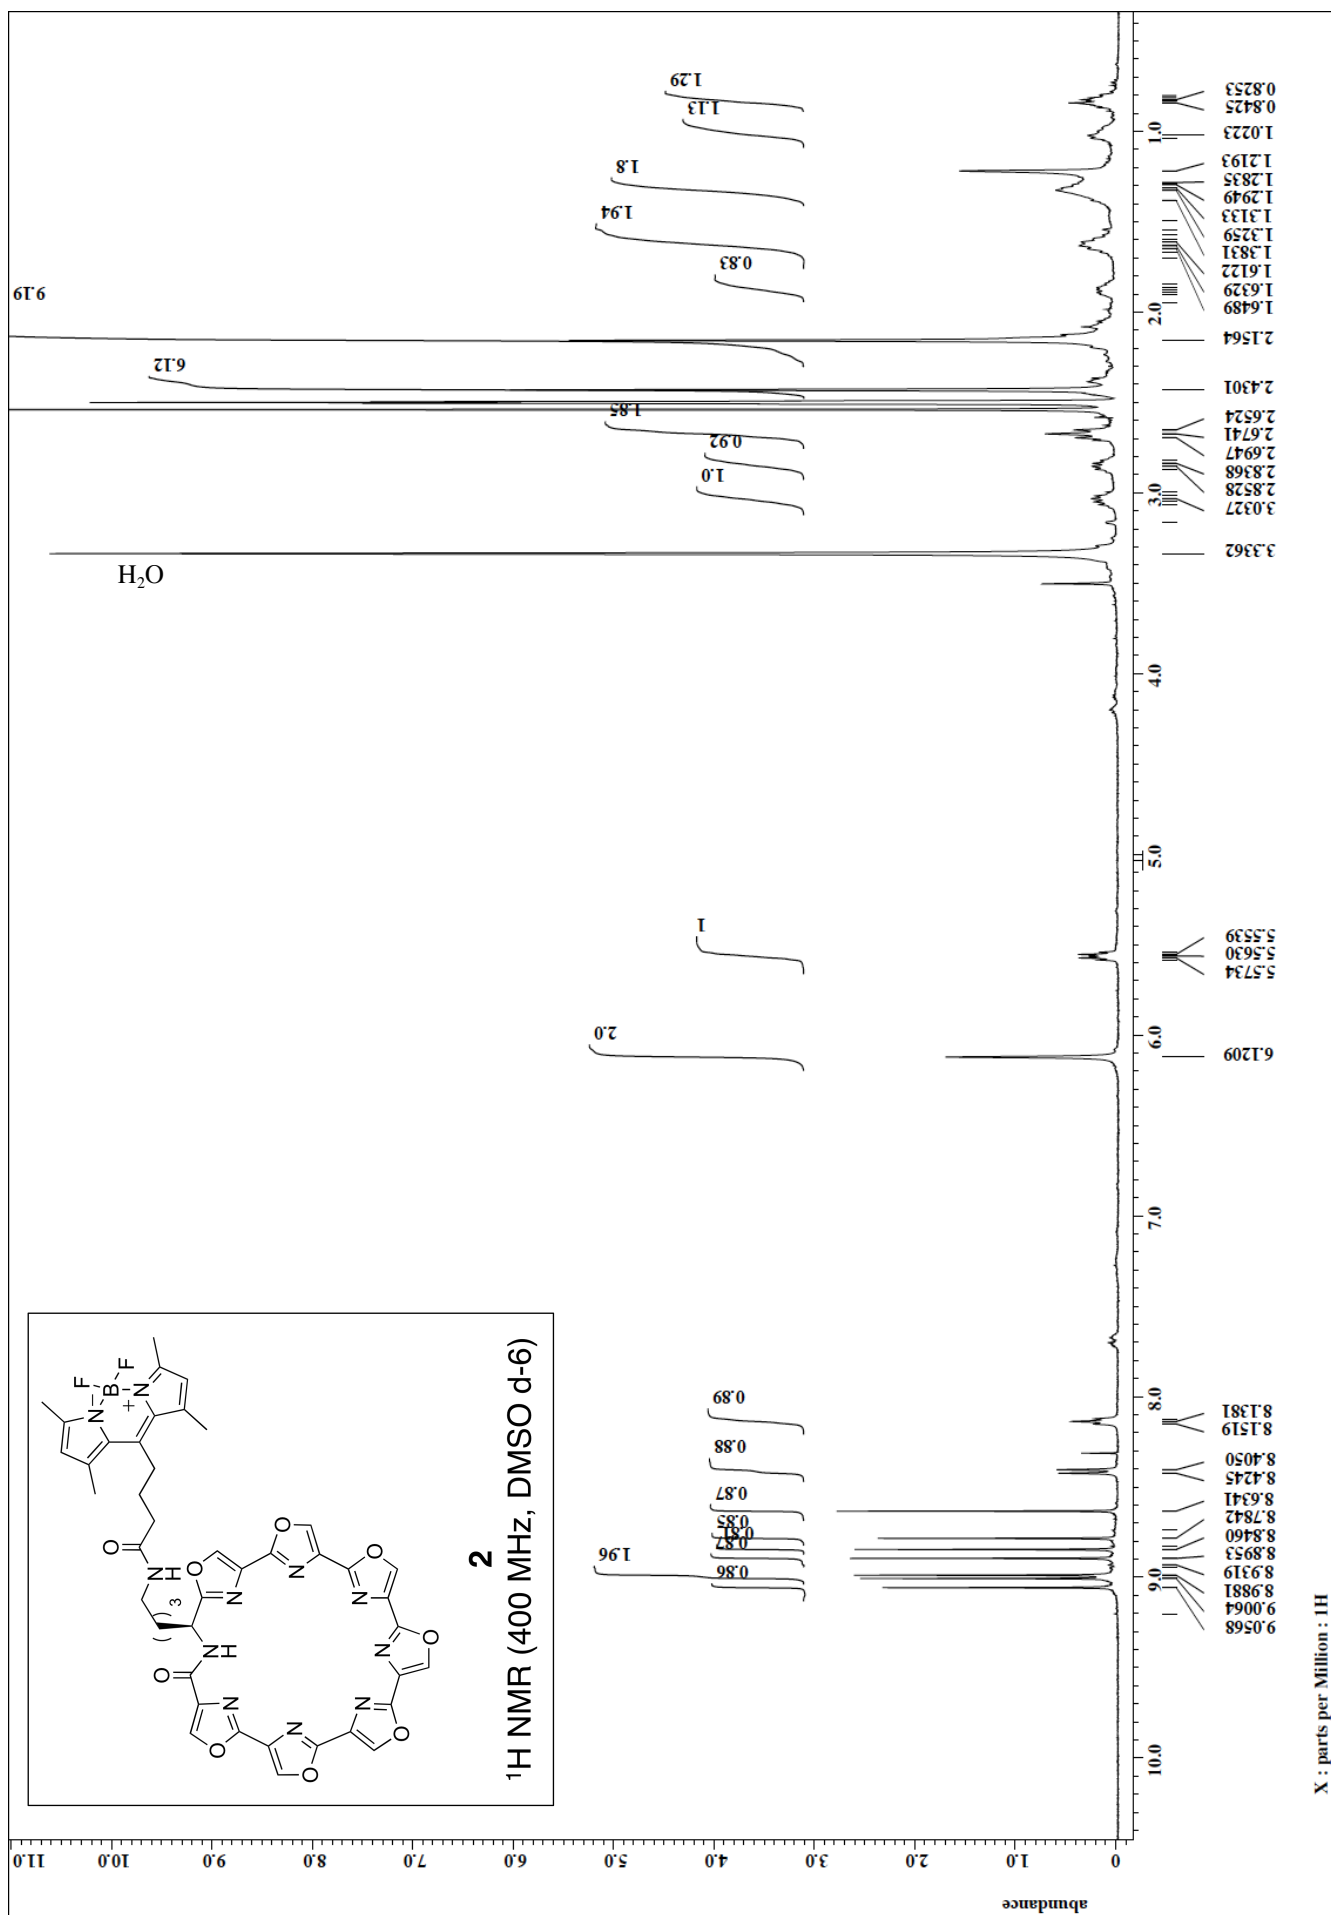

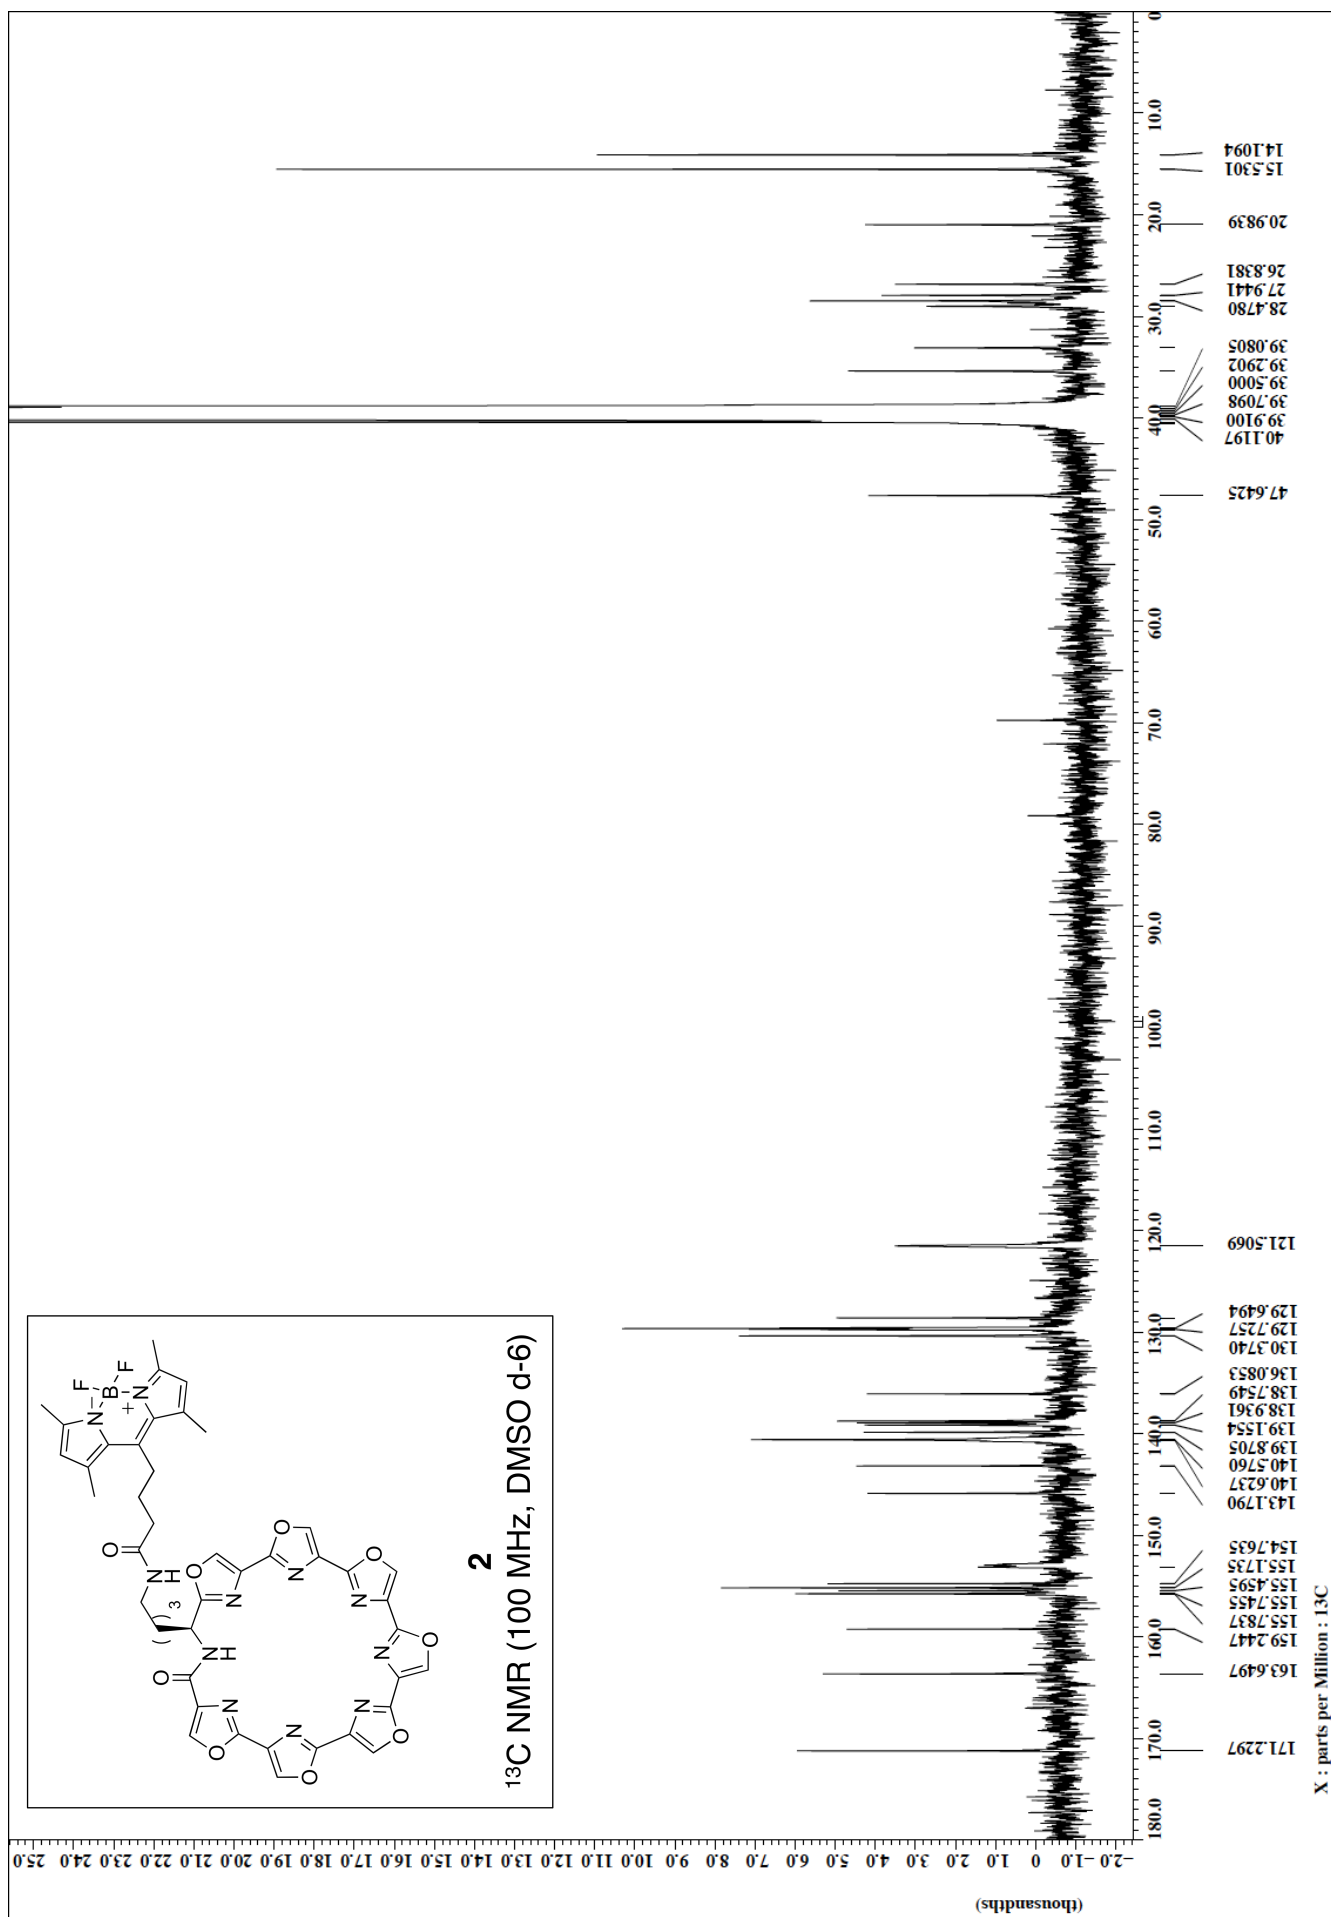

## Excitation and emission spectrum of L1BOD-7OTD (**2**)

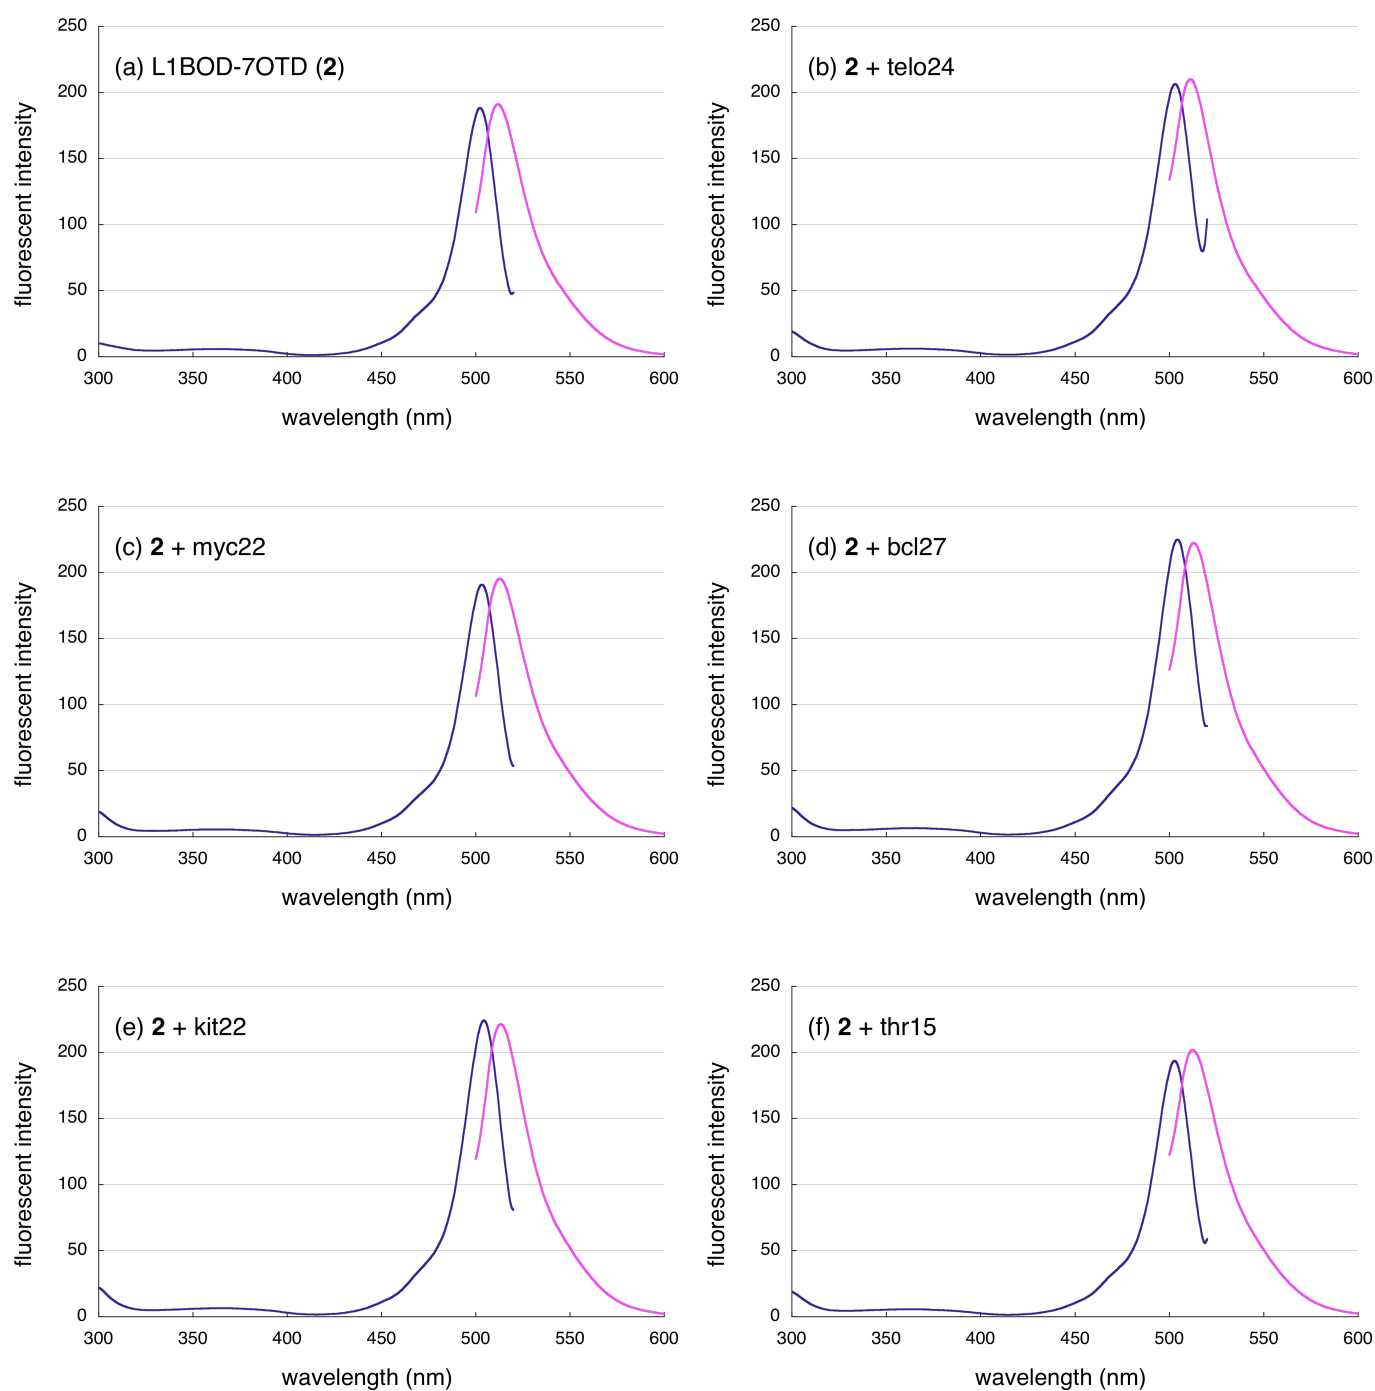

Fig. S1 Excitation and emission spectra of **2** (0.7  $\mu$ M) in the absence (a) or presence (b-f) of GFOs (4  $\mu$ M). All samples were diluted by 10 mM Tris-HCl buffer, pH7.3. The spectra are representative of three averaged scans taken at 25 °C.

UV melting analysis of L1BOD-7OTD (**2**) in the presence of double-stranded DNA.

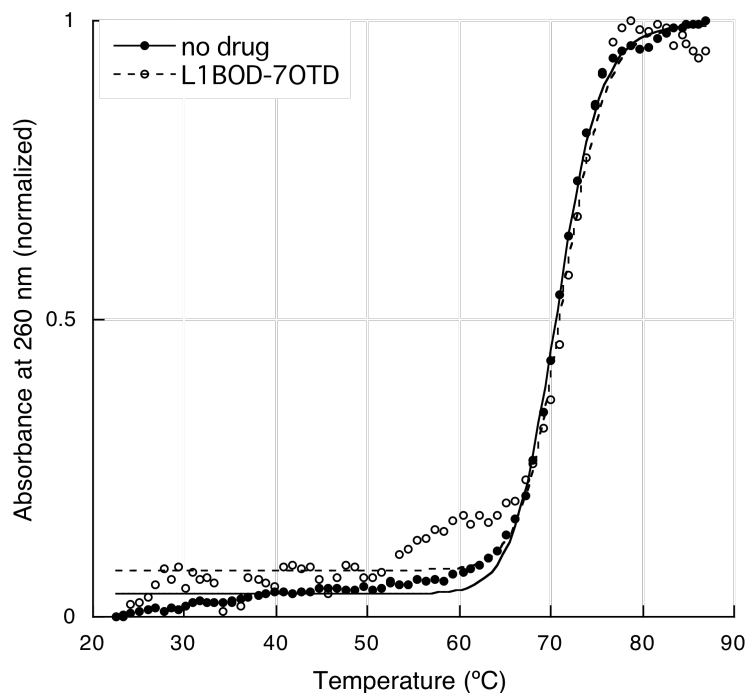

Fig. S2 UV melting curves of double-stranded DNA (salmon sperm DNA) in the absence and presence of L1BOD-7OTD (**2**). The salmon sperm DNA was dissolved in Tris-HCl buffer (10 mM, pH 7.2) containing 50 mM KCl. L1BOD-7OTD was dissolved in DMSO. The salmon sperm DNA was used at a base pair concentration of 15  $\mu$ M and L1BOD-7OTD also used the same concentration. The melting curves were acquired on a Beckman Coulter UV/Visible spectrophotometer (DU 800) using quartz cell of 10-mm optical path length. The heating rate was 1.0  $^{\circ}$ C/min and the samples were allowed to equilibrate for 1.0 min at each temperature setting.

# ESI-MS spectra of GFOs (telo24, myc22, bcl27, kit22 and thr15)

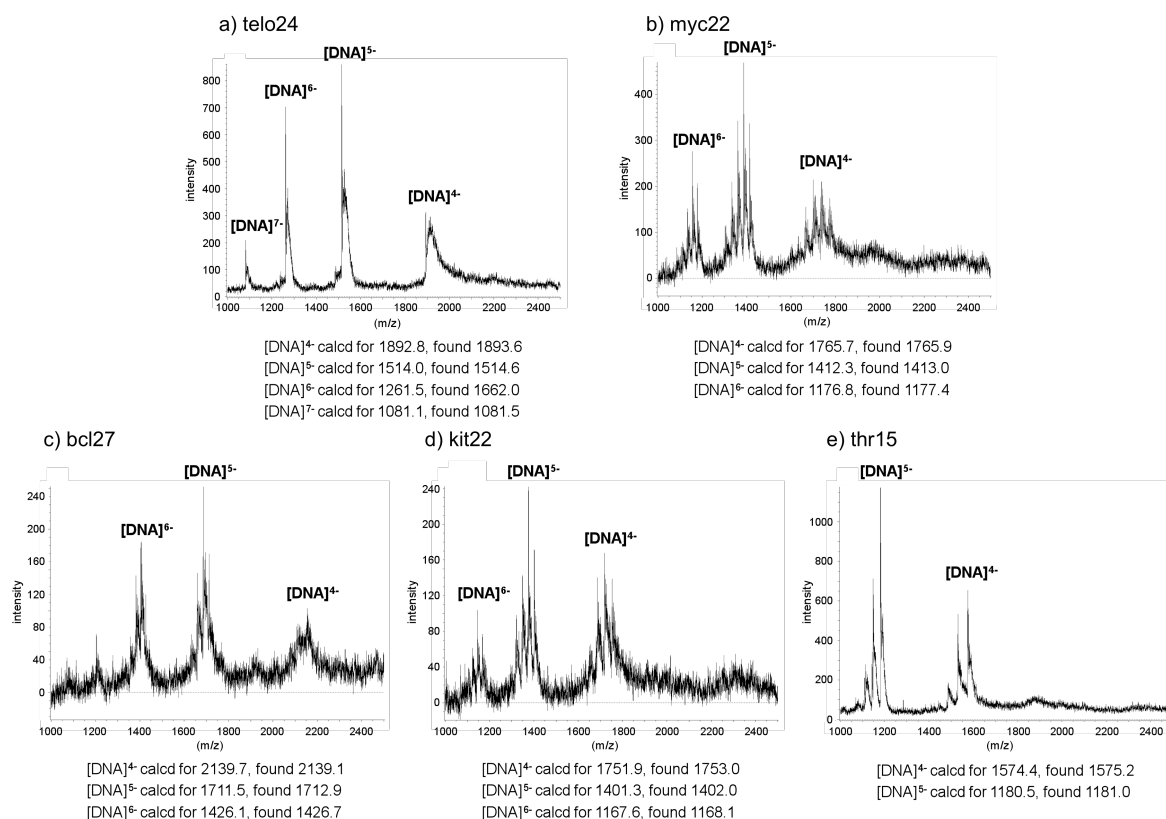

**Fig. S3** ESI-MS spectra of 10  $\mu$ M GFOs without L1BOD-7OTD: (a) telo24, (b) myc22, (c) bcl27, (d) kit22 and (e) thr15. The measurement conditions and the sample preparation procedures were as follows: capillary needle voltage, -2.0 kV; ring lens voltage, -15 V; orifice 1 voltage, -75 V; orifice 2 voltage, 0 V; orifice 1 temperature, 80  $^{\circ}$ C; desolvation temperature, 80  $^{\circ}$ C; sample flow rate, 5  $\mu$ L/min; All experiments were performed in 20 mM NH<sub>4</sub>OAc containing 10  $\mu$ M of GFOs. Methanol (10%) was added just before injection. The role of methanol is to increase ion signals.

Fluorescent polarization (FP) titration using telomut24 and ds-telo24.

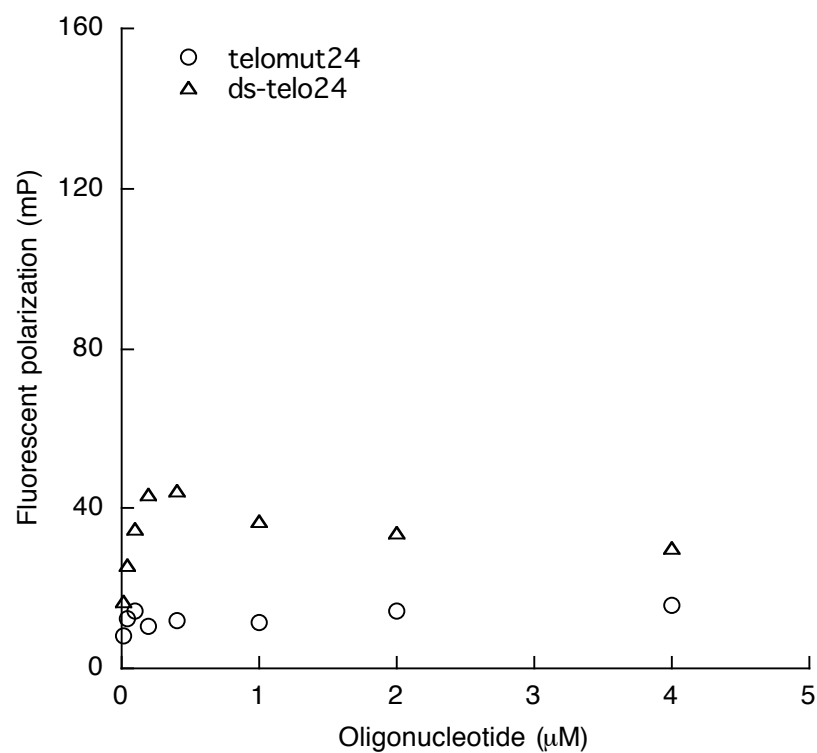

Fig. S4 FP titrations of telomut24 and ds-telo24. L1BOD-7OTD (**2**) (0.7 μM) was incubated with various concentrations (0.02-4 μM) of the oligonucleotides (open circle: telomut24, open triangle: ds-telo24) at 25 °C for 12 h in the presence of 50 mM KCl, 5 mM Tris-HCl, pH 7.0 and 50% DMSO (v/v). The polarization associated with the emission of **2** was measured at 530 nm (excitation at 500 nm). The fluorescent polarization values are representative of five scans taken at 25°C. All plots result from duplicate assays.
